# Supplementary material for: Identification of the Most Suitable Mobile Apps to Support Dietary Approaches to Stop Hypertension (DASH) Diet Self-Management: Systematic Search of App Stores and Content Analysis
Source: MDPI journal article supplement (doi:10.3390/nu15153476), 2023-08-06
Supplement: s1 [file s1]

**Supplementary Materials, Table S1: DASH diet Apps**

|    | App name                                           | App store        | The developer              | Version date | Cost              | Number of downloaded | functions         |                       | comments                                                           |
|----|----------------------------------------------------|------------------|----------------------------|--------------|-------------------|----------------------|-------------------|-----------------------|--------------------------------------------------------------------|
|    |                                                    |                  |                            |              |                   |                      | Self - monitoring | DASH diet information |                                                                    |
| 1  | My Dash Diet : Food tracker and low sodium Recipes | Android<br>Apple | Prestige Worldwide Apps    | 19/04/2022   | £8.48             | +10,000              | ✓                 | ✓                     |                                                                    |
| 2  | Noom                                               | Android<br>Apple | Noom,Inc                   | 8 Dec 2022   | £0.62-<br>£121.82 | 10M+                 | ✓                 | ✓                     |                                                                    |
| 3  | Track – calorie Counter Nutritionnix               | Android<br>Apple | Nutritionnix               | 25 Oct 2021  | £4.77-<br>£23.6   | ---                  | ✓                 | x                     |                                                                    |
| 4  | DASH diet: weight loss plan                        | Android          | Alebg                      | 22/04/2022   | £1.69             | +10,000              | ✓                 | ✓                     |                                                                    |
| 5  | DASH Diet: Doctor Recommendation                   | Apple            | Realized                   | 2021         | £ 10.84           | --                   | ✓                 | ✓                     |                                                                    |
| 6  | DASH to ten                                        | Apple            | Elencee, Inc               | 2020         | £8.18             | --                   | ✓                 | ✓                     |                                                                    |
| 7  | DASH Diet Tracker                                  | Apple            | Rick Hutchinson            | 2021         | £0.81             | ---                  | ✓                 | x                     |                                                                    |
| 8  | DASH Diet Recipes                                  | Android          | Riafy Technologies         | 2021         | £1.29-<br>52.99   | +5,000               | ✓                 | ✓                     | This app offers a variety of diets.                                |
| 9  | DASH diet plan and food tracker                    | Apple            | Nikita Gnedin              | 2020         | £7.66             | ---                  | ✓                 | x                     | Nutrition information related to other diets                       |
| 10 | DASH daily tracker                                 | Android          | Rom Oded                   | 18/05/2021   | free              | No reviews yet       | ✓                 | x                     | Technical issue                                                    |
| 11 | WHEELS for DASH VA                                 | Apple            | The University of Michigan | 2022         | --                | ---                  | ✓                 | ✓                     | The app is part of a research project and requires an access code. |
| 12 | WHEELS for DASH                                    | Apple            | The University of Michigan | 2022         | --                | ---                  | ✓                 | ✓                     | The app is part of a research project and requires an access code. |

**Supplementary Materials, Table S2: Frequency of behaviour change techniques (BCTs) (n = 19) utilised in the apps reviewed**

|   | <b>BCTs</b>                                | <b>Explanation</b>                                                                                                                                                                                                                              | <b>Number of Apps</b> |
|---|--------------------------------------------|-------------------------------------------------------------------------------------------------------------------------------------------------------------------------------------------------------------------------------------------------|-----------------------|
| 1 | Self-monitoring of behaviour               | Ask the person to monitor and record their behaviour(s), including recording their daily food consumption, blood pressure measurements, how many cups of water they drink, and their daily number of steps.                                     | 7                     |
| 2 | Self-monitoring of outcome(s) of behaviour | Require the user to weigh themselves at the end of each day / week or monitor their BP reading for some weeks and record their daily weight on a graph to encourage them to eat healthily.                                                      | 7                     |
| 3 | Problem solving                            | Allow the user to analyse the factors that influence <sup>a</sup> DASH diet adherence and create strategies (e.g. diet self-mentoring) that include overcoming barriers that prevent DASH diet adherence.                                       | 7                     |
| 4 | Action planning                            | Set a plan to cook specific recipes suitable for hypertensive patients or send notifications to complete a task(s) (record food, drink water, measure blood pressure, exercise, read articles) at a particular time.                            | 7                     |
| 5 | Feedback on outcomes of behaviour          | Offer feedback on the behaviour outcome, such as informing the user of how much weight they lost and/or their blood pressure reduce                                                                                                             | 7                     |
| 6 | Review behaviour goal(s)                   | Enable the user to examine their performance of agreed-upon objectives, then modify based on their achievement.                                                                                                                                 | 7                     |
| 7 | Goal setting (behaviour)                   | Allow the user to define goals for the behaviour to be achieved, such as setting a daily aim of eating five pieces of fruit as specified in <sup>a</sup> DASH diet guideline.                                                                   | 7                     |
| 8 | Review outcome goal(s)                     | Enable the user to assess how successfully they have adhered to DASH diet recommendations, such as how much how much weight have you lost, or how much does BP decrease, and adjust their goals accordingly.                                    | 7                     |
| 9 | Feedback on behaviour                      | Provide feedback on performance of the behaviour by displaying data in a graph (e.g., how many calories the user ate each day) or traffic lights colours to demonstrated how healthy the food was and how many calories are consumed every day. | 6                     |

| BCTs |                                           | Explanation                                                                                                                                                       | Number of Apps |
|------|-------------------------------------------|-------------------------------------------------------------------------------------------------------------------------------------------------------------------|----------------|
| 10   | Information about health consequence      | Provide educational information about the benefits of adherence to the DASH diet and consequences of non-adherence to the DASH diet to control hypertension.      | 5              |
| 11   | Prompts/cues                              | Send notifications when it is time to do task(s), such as eating meals at a particular time, recording food or reading articles to remind and encourage the user. | 5              |
| 12   | Habit formation                           | Repeatedly prompt the user to perform a behaviour at the same time in order to elicit a behaviour, such as eating their food at a specific time.                  | 5              |
| 13   | Instruction on how to perform a behaviour | Provide information or tips on how to follow the DASH diet and general information on how to control hypertension.                                                | 4              |
| 14   | Credible source                           | Present information based on evidence.                                                                                                                            | 4              |
| 15   | Social support                            | Offer social support, such as providing a place to chat with a coach or their friends.                                                                            | 4              |
| 16   | Goal setting (outcome)                    | Allow the user to set a goal defined by a positive outcome, such as weight loss (e.g., 0.5 kg in a week).                                                         | 3              |
| 17   | Reduce negative emotions                  | Provide suggestions for activities, such as meditation, for reducing negative feelings.                                                                           | 2              |
| 18   | Biofeedback                               | Inform the user of their blood pressure reading to encourage adoption of the DASH diet.                                                                           | 2              |
| 19   | Social incentive                          | Add points for the user when they answer the quiz questions or achieve their goal.                                                                                | 1              |

---

<sup>a</sup> ***DASH: Dietary Approaches to Stop Hypertension***

**Supplementary Materials, Table S3: Mapping functionalities to BCTs and TDF**

| Functionalities                              | BCTs                                                                                                     | TDF                                                                                                                                           |
|----------------------------------------------|----------------------------------------------------------------------------------------------------------|-----------------------------------------------------------------------------------------------------------------------------------------------|
| <b>Self-monitoring</b>                       | Self-monitoring of behaviour<br>Self-monitoring of outcome(s) of behaviour                               | Behaviour regulation                                                                                                                          |
| <b>Communication with other</b>              | Social support                                                                                           | beliefs about capabilities                                                                                                                    |
| <b>Goal setting</b>                          | Goal setting (outcome)<br>Goal setting (behaviour)<br>Review outcome goal(s)<br>Review behaviour goal(s) | Goals                                                                                                                                         |
| <b>Food plan</b>                             | Action planning<br>Problem solving                                                                       | Skills<br>beliefs about capabilities<br>Goals<br>Behaviour regulation                                                                         |
| <b>Educational information</b>               | Information about health consequences<br>Instruction on how to perform a behaviour<br>Credible source    | Knowledge                                                                                                                                     |
| <b>Feedback</b>                              | Feedback on behaviour<br>Feedback on outcomes of behaviour<br>Biofeedback                                | knowledge<br>reinforcement<br>Knowledge<br>beliefs about consequences                                                                         |
| <b>Reminder and Notification to log food</b> | Prompts / cues<br>Habit formation                                                                        | Skills<br>Behaviour regulation<br>Memory attention and decision process<br>Memory attention and decision process<br>Behaviour regulation goal |
| <b>Stress management</b>                     | Action plan<br>Reduce negative emotion                                                                   | Emotion                                                                                                                                       |

**Supplementary Materials, Table S4:** Data privacy and security evaluation of apps (data gathering, sharing, and security) as stated in the privacy policy.

**Note:** One app did not have a privacy policy available.

| Privacy and security questions |                                                                                                                 | iPhone<br>(N = 2)<br>n | Android<br>(N =4)<br>n | Total<br>(N =6)<br>n |
|--------------------------------|-----------------------------------------------------------------------------------------------------------------|------------------------|------------------------|----------------------|
| Availability                   | Is the privacy policy available without the need to download the app?                                           |                        |                        |                      |
|                                | No                                                                                                              | 0                      | 0                      | 0                    |
|                                | Yes                                                                                                             | 2                      | 4                      | 6                    |
|                                | Is the privacy policy available within the app?                                                                 |                        |                        |                      |
|                                | No                                                                                                              | 0                      | 2                      | 2                    |
| Accessibility                  | Yes                                                                                                             | 2                      | 2                      | 4                    |
|                                | Is there a short form notice (in plain English) highlighting key data practices?                                |                        |                        |                      |
|                                | No                                                                                                              | 0                      | 0                      | 0                    |
|                                | Yes                                                                                                             | 0                      | 0                      | 0                    |
|                                | Not applicable                                                                                                  | 2                      | 4                      | 6                    |
| Data gathering                 | Is the privacy policy available in any other languages?                                                         |                        |                        |                      |
|                                | No                                                                                                              | 2                      | 3                      | 5                    |
|                                | Yes                                                                                                             | 0                      | 1                      | 1                    |
|                                | Does the app collect personally identifiable information?                                                       |                        |                        |                      |
|                                | No                                                                                                              | 0                      | 0                      | 0                    |
| Data sharing                   | Yes                                                                                                             | 2                      | 4                      | 6                    |
|                                | Does the app share users' data with a 3rd party?                                                                |                        |                        |                      |
|                                | No                                                                                                              | 0                      | 1                      | 1                    |
|                                | Yes                                                                                                             | 2                      | 3                      | 5                    |
|                                | Does the app say how the users' data security is ensured? For example, encryption, authentication, and firewall |                        |                        |                      |
| Data security                  | No                                                                                                              | 0                      | 2                      | 2                    |
|                                | Yes                                                                                                             | 2                      | 2                      | 4                    |
